# Supplementary material for: Solvothermal synthesis of mesoporous manganese oxide with enhanced catalytic activity for veratryl alcohol oxidation
Source: Royal Society of Chemistry journal article supplement (doi:10.1039/c4ra00184b), 2014-01-01
Supplement: c4ra00184b1.pdf [file c4ra00184b1.pdf]

## Solvothermal synthesis of mesoporous manganese oxide with enhanced catalytic activity for veratryl alcohol oxidation

### Supporting Information

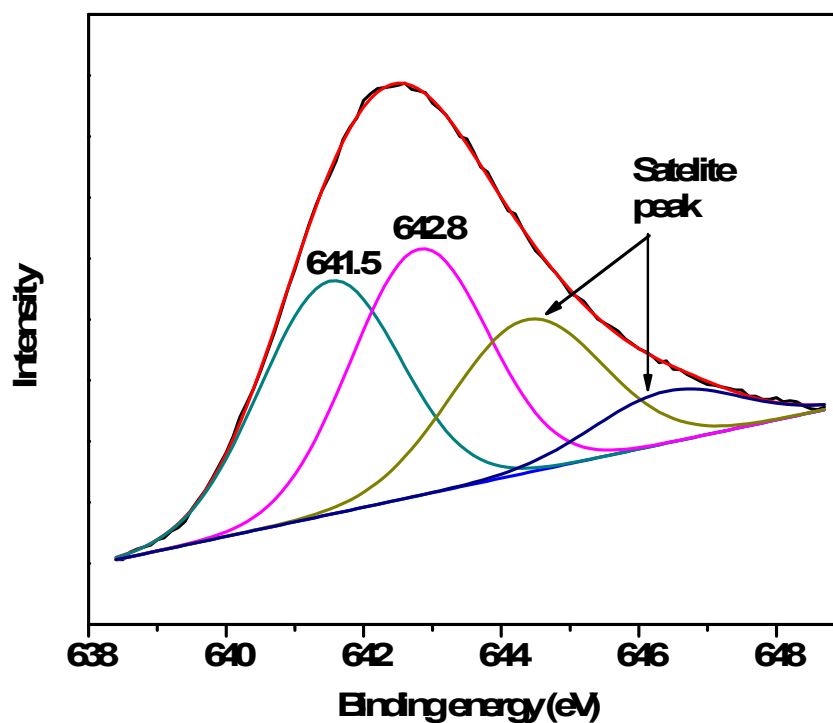

**Fig. S1** XPS of Mn 2p<sub>3/2</sub> of MnO<sub>x</sub>-ST used catalyst after three recycles
